# Supplementary material
Source: publisher site journal article supplement (https://www.spandidos-publications.com/1222/downloadSupplementary)

Figure S1. Detection of E6 protein expression levels in keratinocytes transfected with the overexpression vectors. Western blot analysis was performed to detect the expression levels of (A) HPV16 E6 or (B) HPV18 E6 in keratinocytes transfected with either the overexpression vector or the negative control. HPV, human papillomavirus; overexpression vector, pcDNA3.1-HPV 16/18 E6; negative control, pcDNA3.1.

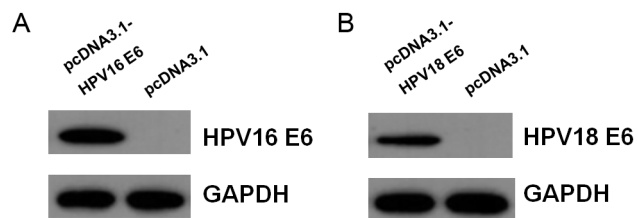

Supplement: Supplementary file 1 [file downloadSupplementary]
